# Supplementary material for: Cognition and Implementation of Disaster Preparedness among Japanese Dialysis Facilities
Source: Int J Nephrol. 2021 Jan 5;2021:6691350. doi: 10.1155/2021/6691350 (PMC7803413; doi:10.1155/2021/6691350)
Supplement: Supplementary Materials — Supplementary Table 1: items in four domain and response categories classified by implementation/non-implementation. Supplementary Table 2: items in scales of each cognition. [file 6691350.f1.zip]

Archive with 2 entries (2 files):
- 6691350.f1/Supplementary_Table_1_final (1).docx
- 6691350.f1/Supplementary_Table_2_final (1).docx
